# Supplementary material for: Radiomics-Based Predictive Model of Radiation-Induced Liver Disease in Hepatocellular Carcinoma Patients Receiving Stereo-Tactic Body Radiotherapy
Source: Biomedicines. 2022 Mar 3;10(3):597. doi: 10.3390/biomedicines10030597 (PMC8945465; doi:10.3390/biomedicines10030597)
Supplement: Supplementary file 1 [file biomedicines-10-00597-s001.zip › biomedicines-1578756-supplementary.pdf]

## Comparisons of Model Validation Between Hold-out and Cross Validation Approaches

For the RF model, the F1 score was  $0.980 \pm 0.060$  and  $0.857$ ; the accuracy was  $0.989 \pm 0.033$  and  $0.944$ ; the AUROC was  $0.993 \pm 0.021$  and  $0.956$  in the cross validation and the original hold-out method, respectively. And for the LR model, the F1 score was  $0.760 \pm 0.184$  and  $0.8$ ; the accuracy was  $0.894 \pm 0.083$  and  $0.944$ ; the AUROC was  $0.918 \pm 0.090$  and  $0.889$  in the cross validation and the original hold-out method, respectively. The detail results of the comparison of model performance between 10-fold cross validation and the original proposed hold-out method was summarized in the Table S1. Based on the cross-validation data, we found a high sensitivity and positive predictive rate with small standard deviations of the proposed models.

**Table S1: Model performance for prediction of RILD using random forest and logistic regression model for hepatocellular carcinoma treated with SBRT**

|                             | Random Forest<br>(10-fold CV) | Random Forest<br>(hold out 20%) | Logistic<br>Regression<br>(10-fold CV) | Logistic<br>Regression<br>(hold out 20%) |
|-----------------------------|-------------------------------|---------------------------------|----------------------------------------|------------------------------------------|
| Sensitivity                 | $1.000 \pm 0.000$             | 1.000                           | $0.950 \pm 0.150$                      | 0.667                                    |
| Specificity                 | $0.986 \pm 0.042$             | 0.933                           | $0.888 \pm 0.090$                      | 1.000                                    |
| Positive predictive<br>rate | $0.967 \pm 0.100$             | 0.750                           | $0.667 \pm 0.236$                      | 1.000                                    |
| Accuracy                    | $0.989 \pm 0.033$             | 0.944                           | $0.894 \pm 0.083$                      | 0.944                                    |
| F1 score                    | $0.980 \pm 0.060$             | 0.857                           | $0.760 \pm 0.184$                      | 0.800                                    |
| AUROC                       | $0.993 \pm 0.021$             | 0.956                           | $0.918 \pm 0.090$                      | 0.889                                    |

\*SBRT:stereotactic body radiation therapy, RILD: radiation-induced liver disease, CV: cross validation, AUROC: area under receiver operating characteristic

**Table S2 Representative cases for the predictions of RILD (Test Case #15 and #16)**

| Patient                  | Test Case #15            | Test Case #16            |
|--------------------------|--------------------------|--------------------------|
| Sex                      | Male                     | Male                     |
| Age                      | 82                       | 39                       |
| ALBI grade               | 2                        | 2                        |
| Child pugh score         | A5                       | A5                       |
| Prescribed dose          | 50 Gy / 5 fractions      | 50 Gy / 5 fractions      |
| Normal liver volume (cc) | 960.12                   | 2315.53                  |
| GTV volume (cc)          | 62.33                    | 179.78                   |
| V5 (%)                   | 69.3                     | 73.22                    |
| V15 (%)                  | 25.32                    | 24.63                    |
| V30 (%)                  | 8.34                     | 8.28                     |
| Difference Average       | 0.511                    | 0.487                    |
| Strength                 | 0.056                    | 0.066                    |
| RILD                     | Neg                      | Pos                      |
| Predict with radiomics   |                          |                          |
| LR (0.531) <sup>a</sup>  | Neg (0.476) <sup>b</sup> | Pos (0.653) <sup>b</sup> |
| RF (0.456) <sup>a</sup>  | Neg (0.278) <sup>b</sup> | Pos (0.910) <sup>b</sup> |

Predict without radiomics

|                         |                                       |                                       |
|-------------------------|---------------------------------------|---------------------------------------|
| LR (0.331) <sup>a</sup> | Neg (0.040) <sup>b</sup>              | Neg <sup>c</sup> (0.080) <sup>b</sup> |
| RF (0.129) <sup>a</sup> | Pos <sup>d</sup> (0.502) <sup>b</sup> | Pos (0.622) <sup>b</sup>              |

\*RILD: radiation-induced liver disease, ALBI: albumin-bilirubin, cc: Cubic Centimeter, GTV: gross tumor volume, LR: logistic regression, RF: random forest, Neg: negative, Pos:positive

<sup>a</sup>best cut-off value   <sup>b</sup>possibility score calculated from predictive model   <sup>c</sup>false negative   <sup>d</sup>false positive

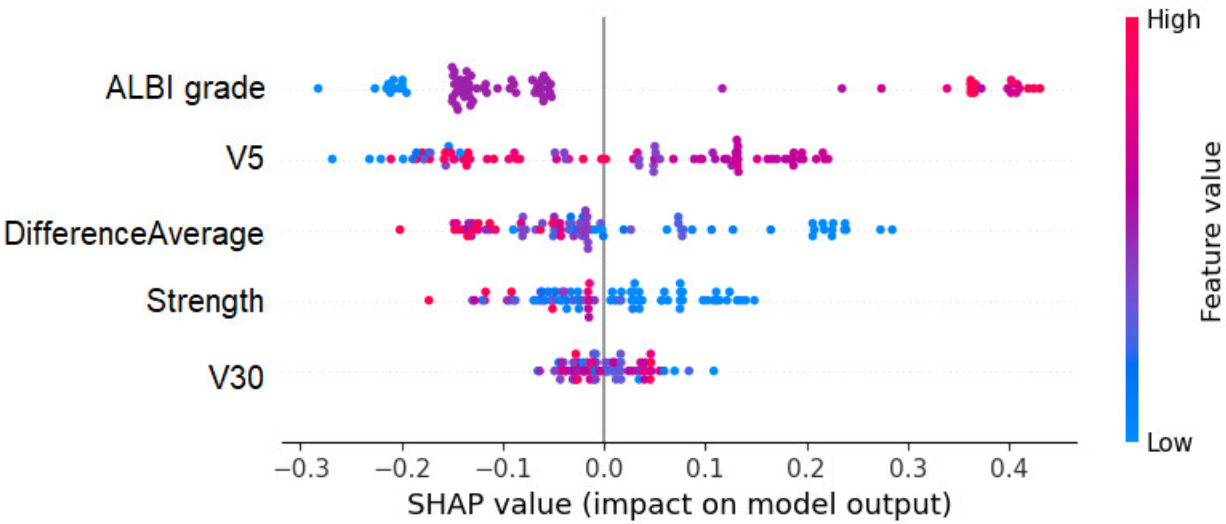

**Figure S1.** Color labeling of each sample point indicates the feature value (red for the high values and blue for low values). The horizontal axis represents the SHAP value reflecting the impact of feature on model decision. Combining the feature values (color of points) and its distribution along the horizontal axis, we could observe the association of feature value with the possibility of RILD occurrence.
